# Supplementary material
Source: Springer Nature journal article supplement (https://www.springermedizin.de/resource/supplementary/12911_2009_313_MOESM2_ESM.PDF/9525458)
Supplement: MOESM2 [file 9525458]

## **Internet and Print-Based Education for Prostate Cancer Screening**

You can help us to understand the best ways of educating men about prostate cancer screening by completing this questionnaire. We would like to make information on prostate cancer screening available on the Internet, but need your feedback about whether this is a good idea or not. Please take a moment to complete the following questions. Thank you very much for your time and participation in our project.

### **1. How often do you use the Internet? (please check one)**

☐ never/rarely ☐ few times a year ☐ once a month ☐ few times/month ☐ once-twice/week  
☐ daily

### **2. Where do you access the Internet? (check as many as apply)**

☐ home ☐ work ☐ other location (library, friend's computer, Internet cafe)  
☐ I don't access the Internet

### **3. When you use the Internet, what sorts of information do you usually look for? (check all that apply)**

☐ General health-related information (e.g., my health, my family's health, medications, etc.)  
☐ Information about prostate cancer  
☐ News, sports, weather, entertainment information  
☐ Work-related information  
☐ Email access (e.g., AOL, Yahoo, MSN accounts)  
☐ Other: \_\_\_\_\_  
☐ I don't access the Internet

### **4. Would you prefer to receive health-related information on the Internet or as a booklet? (please check one)**

Internet ☐ Booklet ☐

### **5. Would you be willing to read information about prostate cancer that is made available to you on the Internet? (please check one)**

☐ I definitely would read it on the Internet  
☐ I probably would read it on the Internet  
☐ I probably would not read it on the Internet  
☐ I definitely would not read it on the Internet

**6. Would you be willing to participate in a research study in which you were asked to log onto an Internet website to get information about the study and to fill out questionnaires on the Internet? (please check one)**

- ☐ I definitely would participate
- ☐ I probably would participate
- ☐ I probably would not participate
- ☐ I definitely would not participate

**7. If you were given a \$10 store coupon (e.g., Safeway, Blockbuster, Best Buy) to participate in the same research study described in #6 above, would you be willing to participate? (please check one)**

- ☐ I definitely would participate
- ☐ I probably would participate
- ☐ I probably would not participate
- ☐ I definitely would not participate

**8. How often do you get tested for prostate cancer? (please check one)**

- ☐ I've never been tested ☐ Every 3-6 months ☐ Every year ☐ Every 1-2 yrs ☐ Less often
- ☐ Don't know/don't remember

**9. Approximately how many times have you been tested for prostate cancer in your lifetime? (This includes the PSA blood test and/or rectal exam). (please check one)**

- ☐ 0 ☐ 1-2 ☐ 3-4 ☐ 5-10 ☐ 11+

**10. Based on what you know about prostate cancer, do you think that medical experts agree that all men should be tested for prostate cancer?**

- ☐ I think that experts do agree on this ☐ I think that experts do not agree on this ☐ Not sure

**11. Why are you here today? (check all that apply)**

- ☐ Just a check-up
- ☐ Illness
- ☐ To bring a friend/relative to a doctor's appointment
- ☐ For blood tests or other laboratory work
- ☐ Other (please specify): \_\_\_\_\_

**12. How old are you? \_\_\_\_\_**

**13. What is your marital status?**

☐ Never married ☐ Married ☐ Living as married ☐ Separated/Divorced ☐ Widowed

**14. How far did you go in school? (please check one)**

☐ less than high school ☐ high school graduate or GED ☐ vocational/trade school

☐ some college ☐ college graduate ☐ some graduate school

☐ graduate/professional degree

**15. To what racial/ethnic group do you belong?**

☐ Black/African American ☐ Hispanic/Latino ☐ Asian/Pacific Islander

☐ Native American ☐ Caribbean or West Indian ☐ White ☐ Other: \_\_\_\_\_

Thank you very much for completing this questionnaire. We sincerely appreciate your time.
